# Supplementary material for: Global patterns of rebound to normal RSV dynamics following COVID-19 suppression
Source: bioRxiv or medRxiv preprint supplement (doi:10.1101/2024.02.23.24303265), 2024-02-24
Supplement: Supplementary file [file media-1.pdf]

1 **Title:** Global patterns of rebound to normal RSV dynamics following COVID-19 suppression

2

3

4 Supplementary to Thindwa et. al.

5

6

7 **Correspondence**

8 \*[deus.thindwa@yale.edu](mailto:deus.thindwa@yale.edu)

9 \*[daniel.weinberger@yale.edu](mailto:daniel.weinberger@yale.edu)

10

## 11 Supplementary Text 1: RSV dynamic time warping and classification

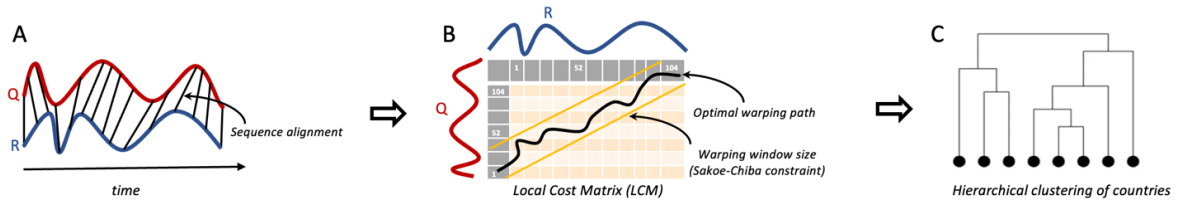

12 Schematic diagram of dynamic time warping (A), local cost matrix (B) and hierarchical  
13 clustering (C) as reference in the text below and drawn using Draw.io software [1]

14

### 15 **Dynamic Time Warping**

16 We adopted a shape-based time series clustering approach using dynamic time warping  
17 (DTW) to quantify dissimilarity between any two time-series (the query-Q and reference-R)  
18 from 26 countries, globally [2]. The DTW algorithm computed the optimum warping path  
19 (minimum distance) between two time-series under certain constraints including  
20 monotonicity, continuity, warping window and boundary. The algorithm initially aligned the  
21 two time-series sequences based on common features before computing distances as  
22 shown in plot (A). The *dtwclust* and *dtw* R packages facilitated implementation of the  
23 algorithm and optimisation [3, 4].

24

### 25 **Local Cost Matrix (LCM)**

26 After computing distances, a local cost matrix (*lcm*) was created with  $n \times m$  dimensions,  
27 corresponding to the length of the time series, for every pair of time-series compared. Given  
28 the *Q* and *R* input time-series, for each element  $(i, j)$  of the *lcm* shown as each cell in plot  
29 (B), the distance  $l_p$  norm (Euclidean) between  $Q_i$  and  $R_j$  was computed as

$$30 \quad lcm(i, j) = \left( \sum |Q_i - R_j|^p \right)^{1/p}$$

31

32 Hence, the DTW algorithm identified the path that minimizes the alignment between *Q* and *R*  
33 by iteratively stepping through the *LCM*, starting at  $lcm(1,1)$  and finishing at  $lcm(n, m)$ , and  
34 aggregating the cost. At each step, the algorithm found the direction in which the cost

35 increases the least under the above constraints. We defined  $\varphi = \{(1,1), \dots, (n, m)\}$  as a set  
36 containing all the points that fell on the optimum path, with the final distance computed as  
37 below and facilitated by *proxy* R package [5], where  $m_\varphi$  is a per-step weighting coefficient  
38 and  $M_\varphi$  is the corresponding normalization constant:

$$39 \quad DTW_p(Q, R) = \left( \sum \frac{m_\varphi lcm(k)^p}{M_\varphi} \right)^{1/p}, \forall k \in \varphi$$

40

#### 41 **DTW window size**

42 To limit the area of the LCM that can be reached by the DTW algorithm to marginally speed  
43 up the DTW calculation, we implemented the Sakoe-Chiba window as a global constraint [6],  
44 with which the allowed region was created along the diagonal of the LCM as shown in plot  
45 (B). For a window size  $w$ , the valid region of the LCM, the slanted band window, constituted  
46 all valid points in the range  $[(i, j - w), (i, j + w)]$  for all  $(i, j)$  along the LCM diagonal, and at  
47 each step,  $2w + 1$  elements fell within the window. To select an optimal window size and  
48 number of clusters for hierarchical clustering of countries as shown in plot (C), we evaluated  
49 clustering using Modified Davies-Bouldin (DB) internal cluster validity index (CVI), iterating  
50 across different values of window size from 1 to 100 and of cluster size from 2 to 4 [4, 7, 8].  
51 For each window size and cluster size, the DB CVI calculated distances from computed  
52 cluster centroids (centroid choice is described below).

53

#### 54 **Time series prototype or centroid**

55 We computed an average series or prototype or centroid to define a time-series that  
56 effectively summarizes the most important characteristics of all series in a given cluster. Our  
57 choice of prototyping function was the DTW barycentre averaging corresponding to DTW  
58 distance measure. The DTW barycentre averaging approach randomly selected one of the  
59 series in the data as a centroid, such that on each iteration, the DTW alignment between  
60 each series in the cluster and centroid was computed. Warping was performed in DTW, and  
61 several time-points from a given time-series mapped to a single time-point in the centroid

62 series, so for each time-point in the centroid, all the corresponding values from all series in a  
63 cluster were grouped together according to DTW alignments, and the mean was computed  
64 for each centroid point using the values contained in each group. This was iteratively  
65 repeated until convergence was assumed (Figure S9).

66

67 Hierarchical clustering of countries created a hierarchy of groups in which, as the level in the  
68 hierarchy increased, clusters were created by merging clusters from the next lower level,  
69 such that an ordered sequence of groupings was obtained [9]. The created hierarchy was  
70 visualized as a binary tree using dendrogram where the height of each node was  
71 proportional to the value of the inter-group dissimilarity between its two daughter nodes  
72 (Figure 4, Figure S10).

73

## 74 Supplementary Text 2: RSV seasonal metrics calculation

75

### 76 **Generalised additive modelling with P-spline**

77 Given the time series data from 28 countries, we fitted generalized additive models with  
78 penalised B-spline (P-spline) [10]. Weekly RSV cases were assumed to follow a Poisson  
79 distribution with mean ( $\mu$ ) as follows.

$$80 \quad y_i \sim \text{Poisson}(\mu_i),$$

81 where  $\mu$  is equal to the expectation of  $y_i$ :

$$82 \quad \mu = \mathbb{E}(y_i),$$

83 and

$$84 \quad \text{Log}(\mu) = \beta_0 + f(t).$$

85  $\text{Log}(\mu)$  is equal to the intercept ( $\beta_0$ ) and smooth function of weekly cases ( $f(t)$ ) using  
86 penalized B-splines (P-splines), with a log link function for the Poisson distribution family.

87

### 88 **Epidemic analysis**

89 We defined four metrics to summarize RSV epidemics before and after COVID-19  
90 suppression period in each of the 28 countries (Figure 1).

91

92 1. Onset timing (O) was defined as a week of epidemic start corresponding to the timing of  
93 the maximum of the second derivative in the segment of increasing first derivative for the  
94 fitted P-spline with respect to time (week); this is mathematically represented as [11]:

$$95 \quad O = t: \text{Max} \left\{ \frac{d}{dt} \left[ \frac{d(f(t))}{dt} > 0 \right] \right\}$$

96

97 2. Peak timing (P) was defined as the week of maximum wave cases, which corresponds to  
98 the timing of the maximum value of the fitted P-spline curve in each epidemic wave [12],  
99 represented as:

$$100 \quad P = t: \text{Max}\{f(t)\}$$

101

102 3. Growth rate (G) was defined as the number of new cases per week corresponding to the  
103 maximum value of the derivative of the log-transformed fitted P-spline curve with respect  
104 to time (week) [13]; this is mathematically represented as:

$$105 \quad G = \text{Max} \left\{ \frac{d}{dt} [\log(f(t)) > 0] \right\}$$

106

107 4. Intensity (I) was defined as the relative magnitude of cases before the epidemic peak,  
108 corresponding to the integral of the positive derivative of the log fitted P-spline curve with  
109 respect to time (week); this is mathematically represented as:

$$110 \quad I = \int \left\{ \frac{d}{dt} [\log(f(t)) > 0] > 0 \right\} dt$$

111

## 112 **Correlation coefficients**

113 We performed correlation tests between two distinct phases of time series in 28 countries  
114 globally to establish degree of return to normal RSV patterns post COVID-19 suppression.

115 We compared pre COVID-19 mean onset and peak timings, growth rate and intensity first  
116 wave, second wave and third wave of RSV epidemic following COVID-19 suppression.

117 Onset and peak timings for pre- and post-COVID-19 phases were quantified using circular  
118 correlation coefficient ( $c$ ), as implemented in circular R package [14], and visualised using X-

119 Y plots. Assume a sample of  $n$  pairs of time series points or angles  $\{(a_{11}, a_{21}), (a_{12}, a_{22}), \dots,$   
120  $(a_{1n}, a_{2n})\}$  corresponding to the two phases of time series, then the circular correlation is

121 given by:

$$122 \quad c = \frac{\sum_{k=1}^n \sin(a_{1k} - T_{11}) \sin(a_{2k} - T_{21})}{\sqrt{\sum_{k=1}^n \sin^2(a_{1k} - T_{11}) \sum_{k=1}^n \sin^2(a_{2k} - T_{21})}}$$

123 where  $T_{11}$  is mean direction of the first circular variable, and  $T_{21}$  is the mean direction of the  
124 second circular variable.

125

126 Growth rate and intensity for pre- and post-COVID-19 phases were quantified using  
127 Pearson's correlation coefficient ( $r$ ), as implemented in the stats R package, and visualised  
128 using X-Y plots. Assume a sample of  $n$  pairs of time series points  $\{(x_1, y_1), (x_2, y_2), \dots,$   
129  $(y_n, y_n)\}$  corresponding to the two phases of time series, then the Pearson's correlation is  
130 given by:

$$131 \quad r = \frac{\sum_{i=1}^n (x_i - \bar{x})(y_i - \bar{y})}{\sqrt{\sum_{i=1}^n (x_i - \bar{x})^2 \sum_{i=1}^n (y_i - \bar{y})^2}}$$

132 where  $\bar{x} = 1/n \sum_{i=1}^n x_i$  is the sample mean, and analogously for  $\bar{y}$ .

133

### 134 **Regression models of RSV onset, peak timing, growth rate, and intensity**

135 Cox Proportional Hazards regression models were separately fitted to 'time to RSV onset'  
136 and 'time to RSV peak' to identify factors associated with the timing of RSV waves, whereas  
137 linear models were fitted to 'RSV growth rate' and 'RSV intensity'. Mathematical descriptions  
138 of the fully saturated models are given below:

139

140 *Expected hazard(time to onset or time to peak of RSV epidemic)*

141  $= (\text{baseline hazard}) \exp(b_1 \text{ Covid19 contact stringency index}_{30 \text{ days moving average}}$

142  $+ b_2 \text{ population density} + b_3 \text{ climate zone} + b_4 \text{ hemisphere}$

143  $+ b_5 \text{ outOfSeason during RSV 1st wave} + b_6 \text{ intensity during RSV 1st wave})$

144 where the baseline hazard represents the hazard when all predictors are equal to 0, and

145  $b_1, b_2, \dots, b_n$  are predictor coefficients. Predictors are included or excluded in the multivariate

146 model based on stepwise selection [15]. The hazard ratio (HR) is the ratio of expected

147 hazards between the two comparison groups.

148

149 *Expected value(growth rate or intensity)*

150  $= (\textit{intercept}) + b_1 \textit{ Covid19 contact stringency index}_{30 \textit{ days moving average}}$

151  $+ b_2 \textit{ population density} + b_3 \textit{ climate zone} + b_4 \textit{ hemisphere}$

152  $+ b_5 \textit{ outOfSeason during RSV 1st wave} + b_6 \textit{ intensity during RSV 1st wave}$

153 where the intercept represents the expected growth rate or intensity when all predictors are

154 equal to 0, and  $b_1, b_2, \dots, b_n$  are predictor coefficients. Predictors are included or excluded in

155 the multivariate model based on stepwise selection [15]. The effect size is the ratio of

156 expected values between the two comparison groups.

157



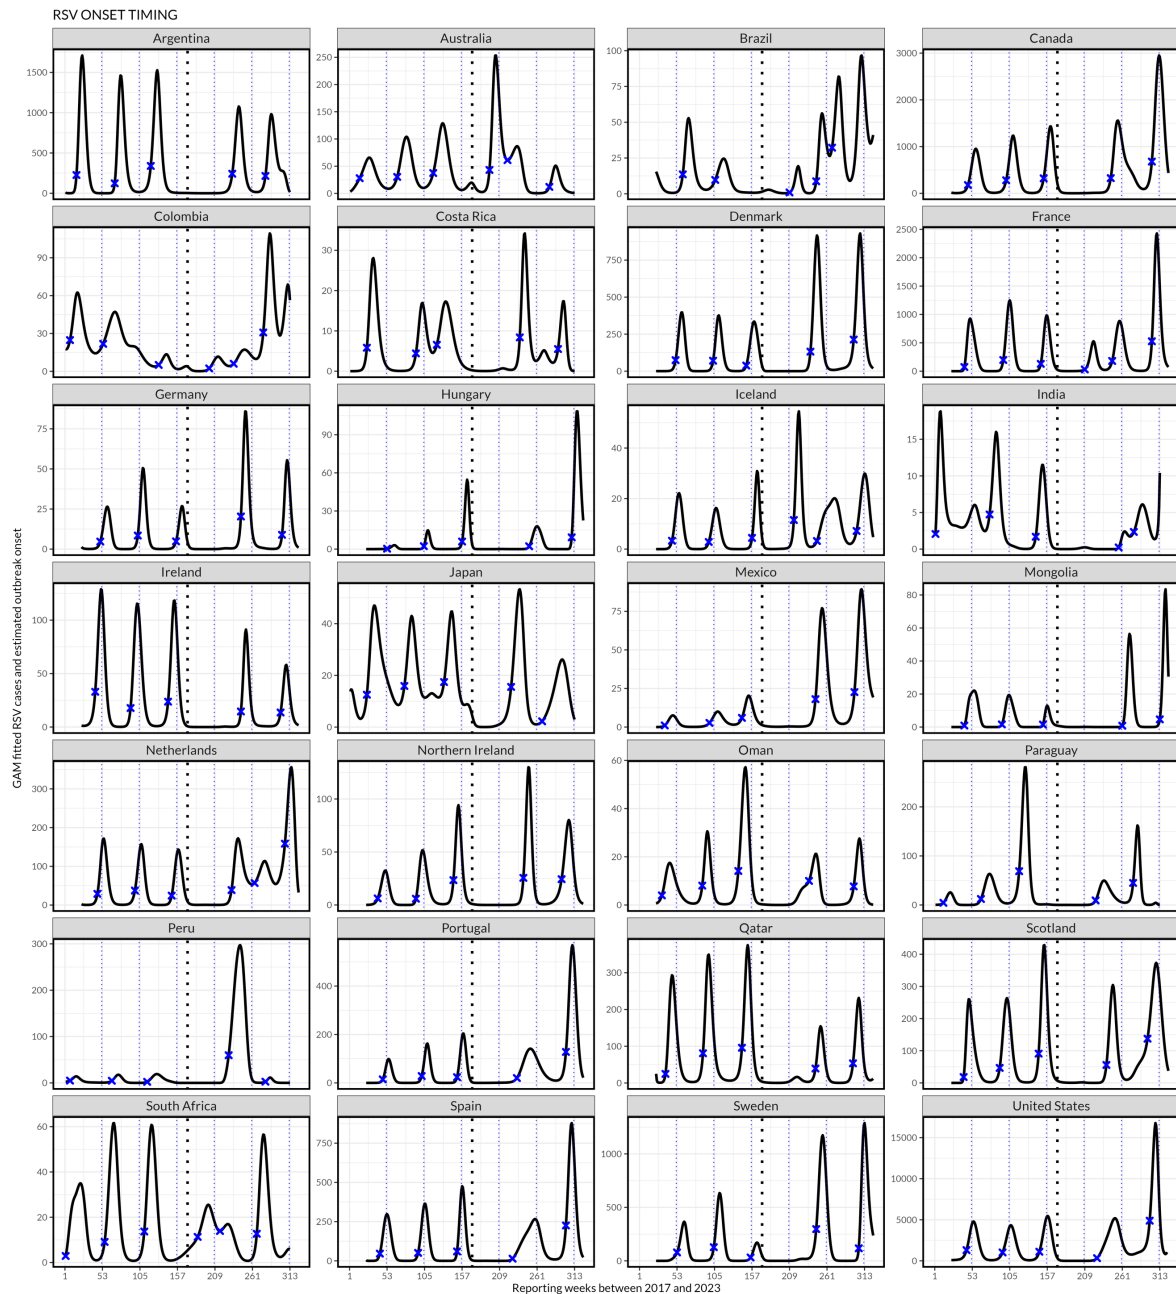

158 Supplementary Figure 1. Onset of respiratory syncytial virus (RSV) epidemics across 28  
 159 member countries of the World Health Organisation (WHO). The solid black line  
 160 corresponds to the fitted P-spline, the dotted black line corresponds to April 2020 at the  
 161 beginning of COVID-19 pandemic, and the blue star corresponds to the maximum second  
 162 derivative value in the segment of increasing first derivative of the fitted P-spline GAM which  
 163 defines the start of RSV epidemic (onset) as described in Figure 1.  
 164

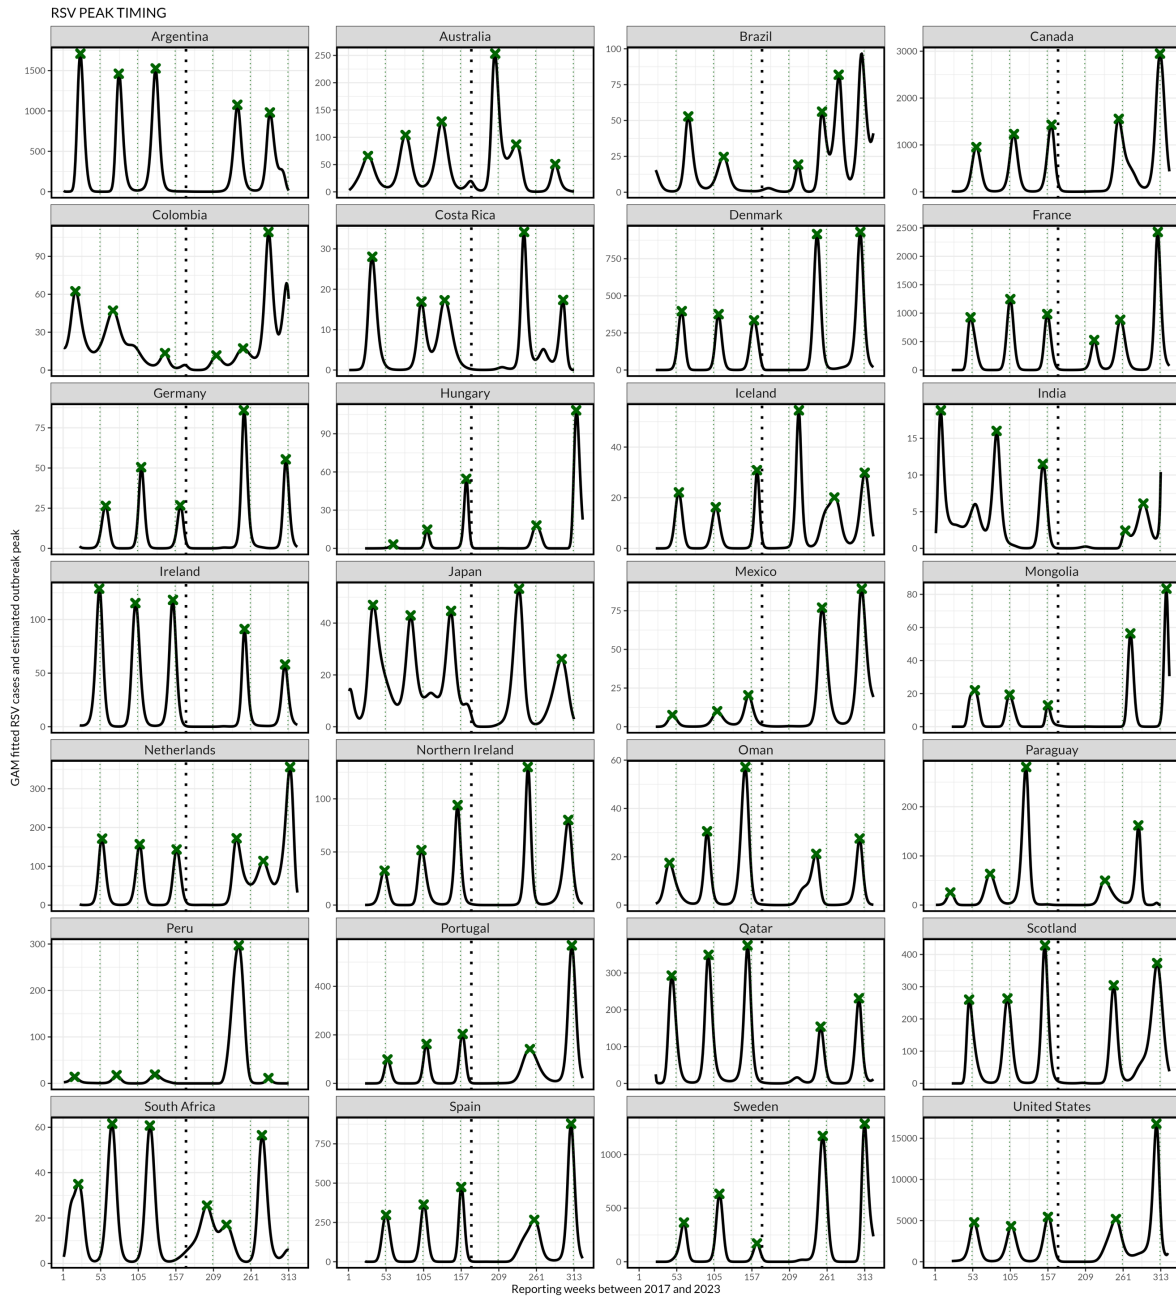

165 Supplementary Figure 2. Peak timing of respiratory syncytial virus (RSV) epidemics across  
 166 28 member countries of the World Health Organisation (WHO). The solid black line indicates  
 167 the generalised additive model (GAM) fit with P-splines, the dotted black line corresponds to  
 168 April 2020 at the beginning of COVID-19 pandemic, and the green star corresponds to the  
 169 maximum value of the black fitted P-spline GAM, defining the wave peak of RSV cases.  
 170

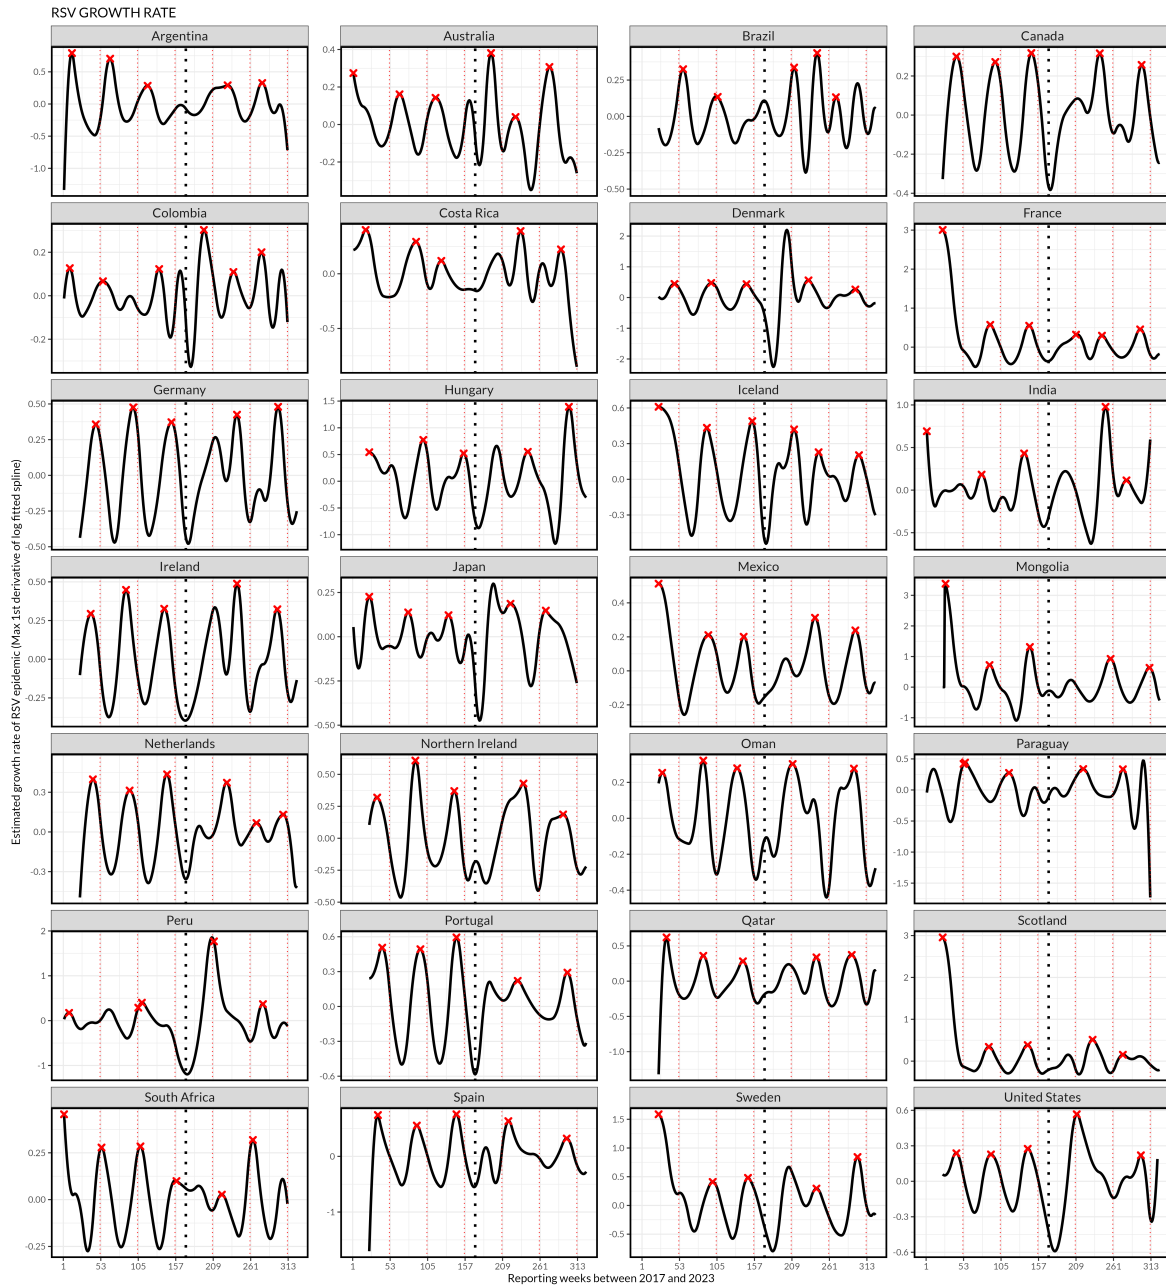

171 Supplementary Figure 3. Growth rate of respiratory syncytial virus (RSV) epidemics across  
 172 28 member countries of the World Health Organisation (WHO). The solid black line  
 173 corresponds to the first derivative of the log of the fitted P-spline GAM, the dotted black line  
 174 corresponds to April 2020 at the beginning of COVID-19 pandemic, and the red star  
 175 corresponds to the maximum value of the black line which defines the maximum number of  
 176 new cases per week (growth rate) as described in Figure 1.  
 177

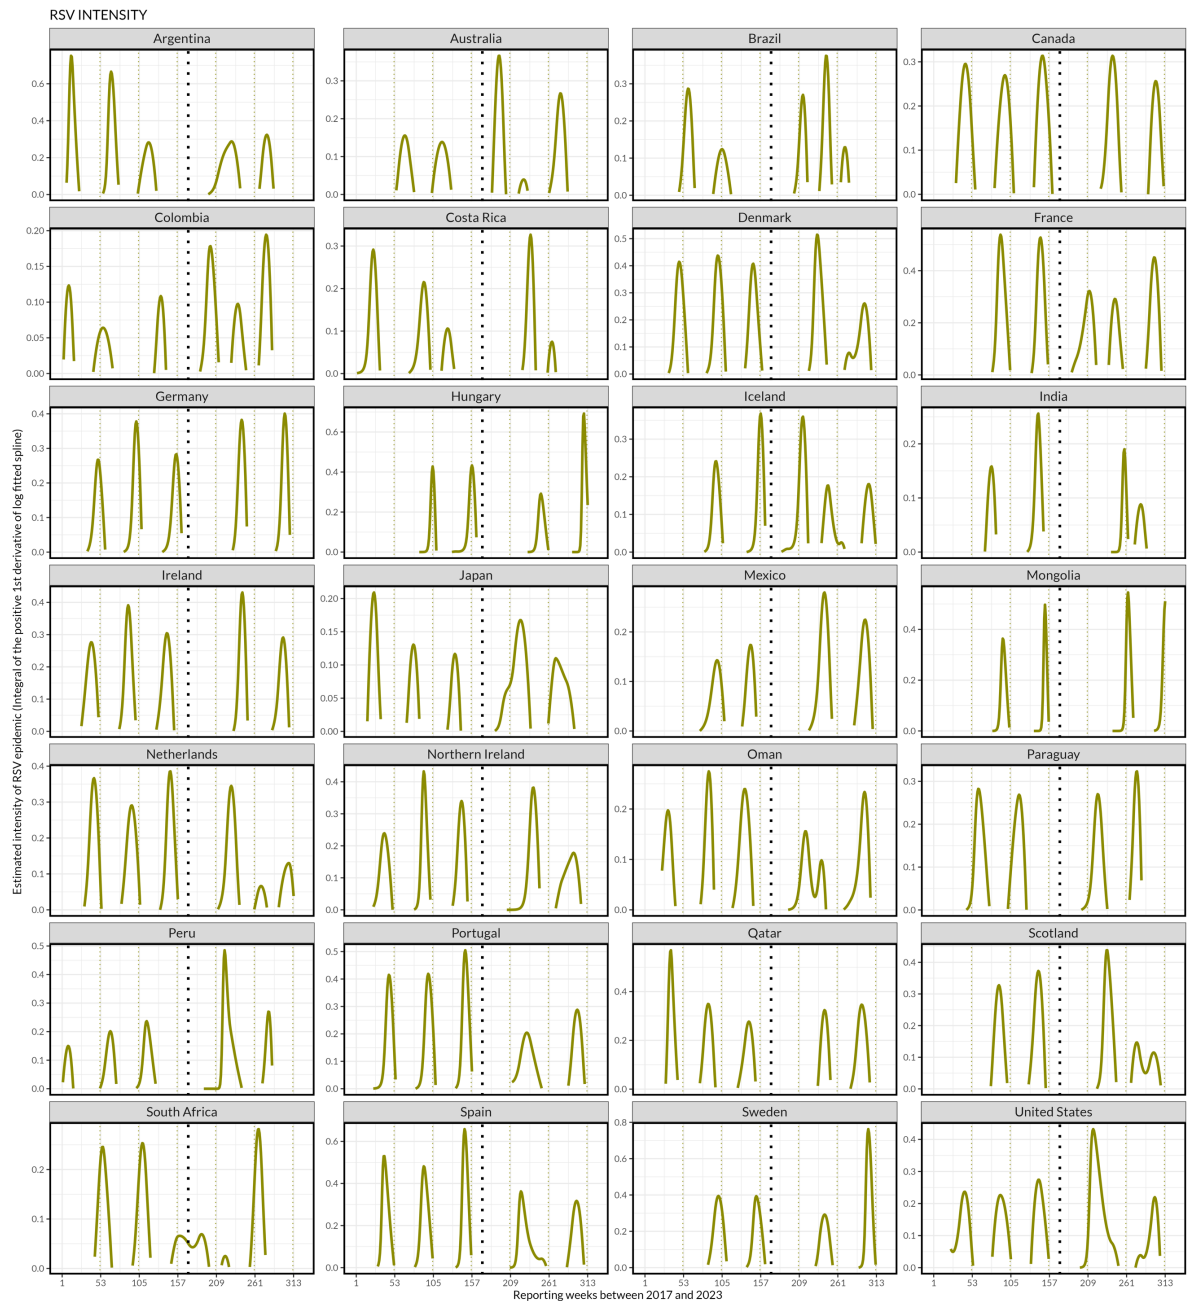

178 Supplementary Figure 4. Intensity of respiratory syncytial virus (RSV) epidemics across 28  
 179 member countries of the World Health Organisation (WHO). The dotted black line  
 180 corresponds to April 2020 at the beginning of COVID-19 pandemic, and the area under the  
 181 curve indicates the relative magnitude of RSV cases in each wave corresponding to the  
 182 integral of the positive derivative of the log fitted black GAM P-spline before epidemic peak  
 183 timing.  
 184

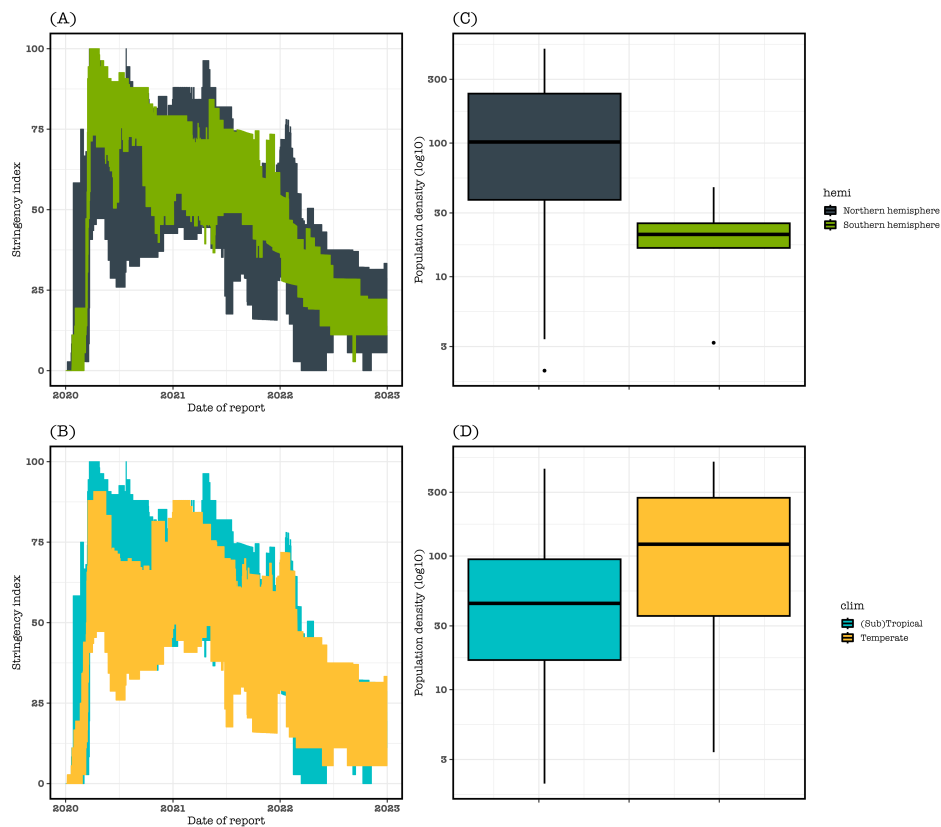

185 Supplementary Figure 5. Distribution of contact stringency index and population density by  
 186 hemisphere and climate zone. (A, B) The contact stringency index is sourced from the  
 187 Oxford COVID-19 Government Response Tracker data and uses nine metrics to calculate  
 188 the Government Stringency Index including school closures, workplace closures,  
 189 cancellation of public events, restrictions on public gatherings, closures of public transport,  
 190 stay-at-home requirements, public information campaigns, restrictions on internal  
 191 movements, and international travel controls. The stringency index is stratified by  
 192 hemisphere and climate zone, with value of 0 referring to no restriction and 100 to maximum  
 193 restrictions. (C, D) Box plot showing the spread of individuals per square kilometer  
 194 (population density), in each hemisphere and climate zone.  
 195

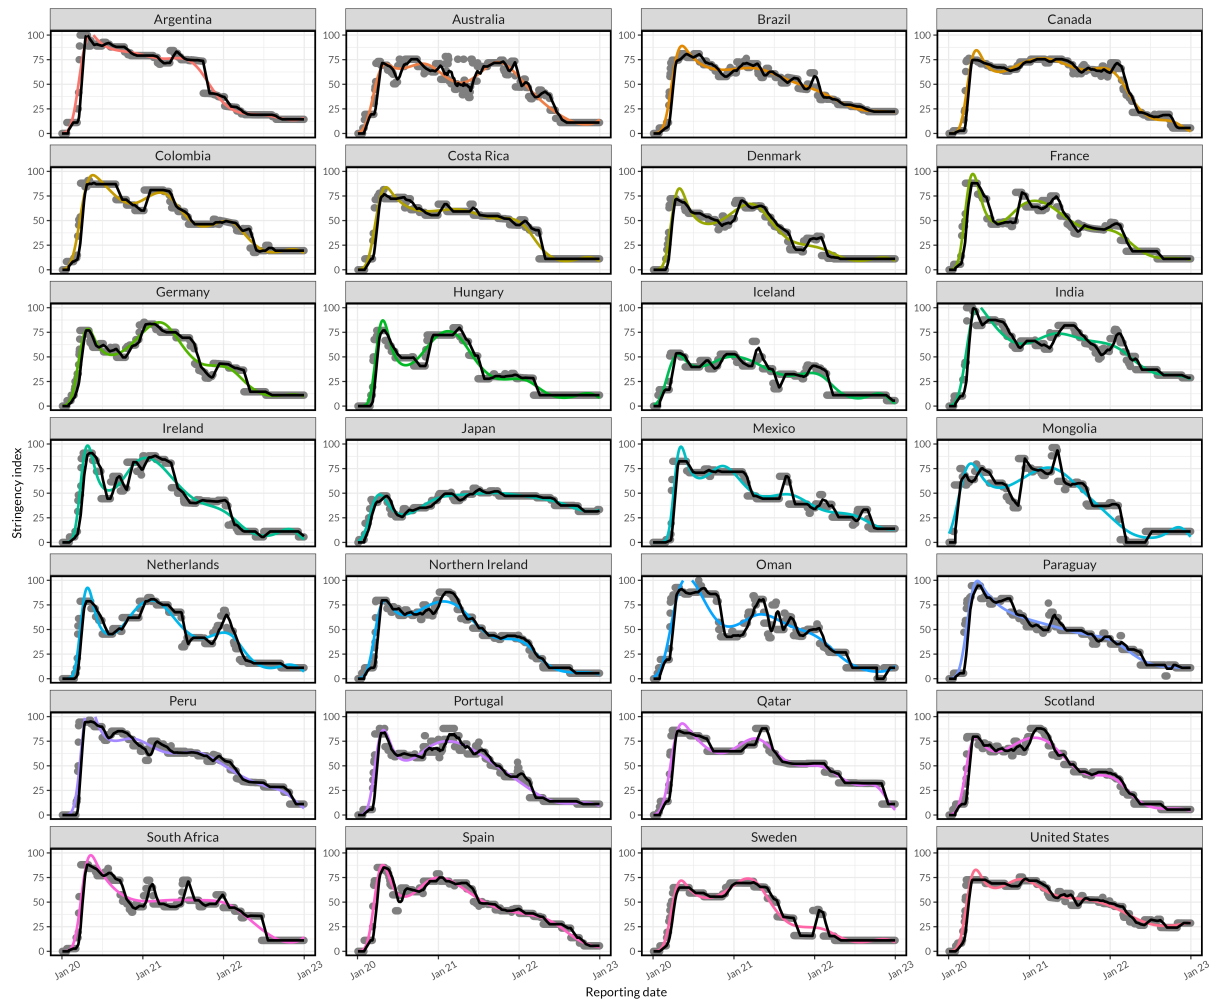

196

197 Supplementary Figure 6. Distribution of contact stringency index in 28 countries, globally.

198 Thirty-days moving average (Black line), and generalised additive model (Color lines) fitted

199 to reported stringency index (Gray points) to smooth out short-term effects of contact

200 stringency. The contact stringency index is sourced from the Oxford COVID-19 Government

201 Response Tracker data and uses nine metrics to calculate the Government Stringency Index

202 including school closures, workplace closures, cancellation of public events, restrictions on

203 public gatherings, closures of public transport, stay-at-home requirements, public information

204 campaigns, restrictions on internal movements, and international travel controls. The

205 stringency index has value of 0 referring to no restriction and 100 to maximum restrictions.

206

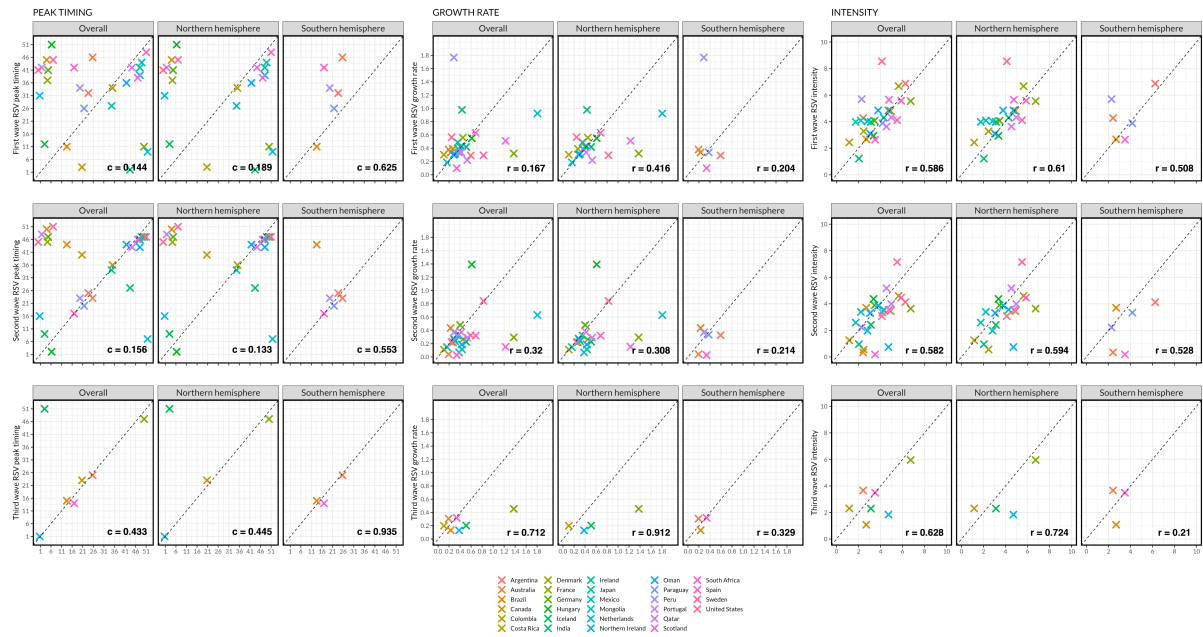

207

208 Supplementary Figure 7. Respiratory syncytial virus (RSV) epidemic peak timing, growth  
 209 rate and intensity in 28 countries. Comparing the RSV epidemic peak timing, growth rate  
 210 and intensity between pre COVID-19 vs first, second and third waves of RSV in all countries,  
 211 and by northern and southern hemispheres. The  $c$  metric refers to the circular correlation  
 212 coefficient whereas  $r$  metric is the Pearson's correlation coefficient.

213

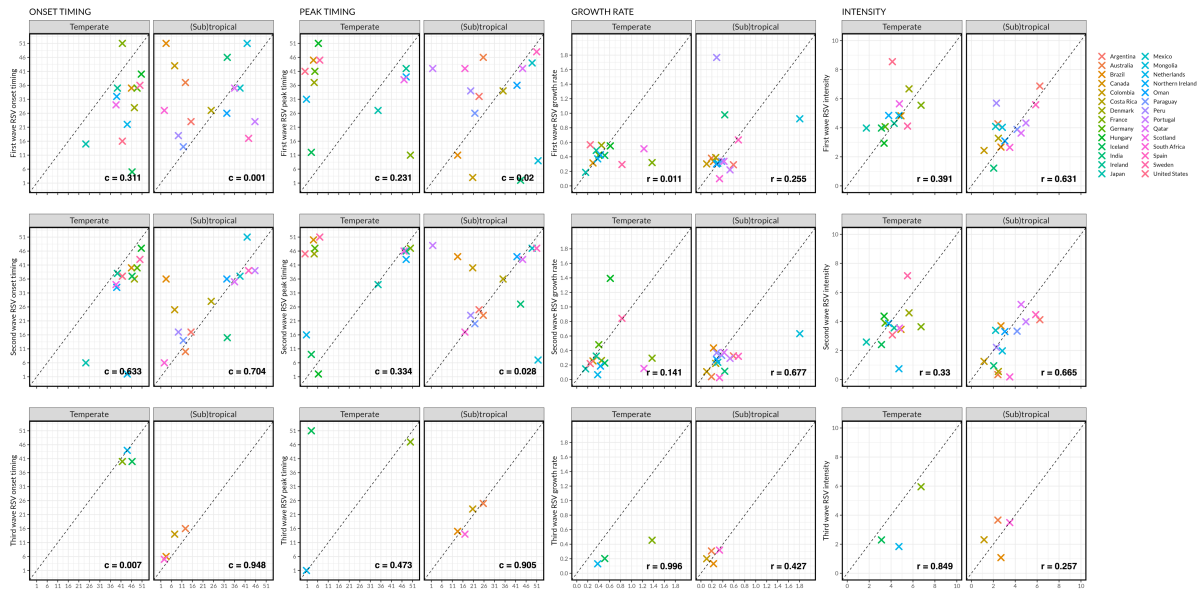

214 Supplementary Figure 8. Respiratory syncytial virus (RSV) epidemic onset timing, peak  
 215 timing, growth rate and intensity in 28 countries. Comparing the RSV epidemic onset timing,  
 216 peak timing, growth rate and intensity between pre COVID-19 vs first, second and third  
 217 waves of RSV in all countries, and by Temperate and (Sub)tropical. The  $c$  metric refers to  
 218 the circular correlation coefficient whereas  $r$  metric is the Pearson's correlation coefficient.  
 219



Supplementary Table 1. Correlation coefficients between different RSV waves post-COVID-19 and pre-COVID-19 mean values among countries that had a third wave of RSV.

| Season epidemic metric                                                                                                                                                                                                                                     | Correlation between pre-COVID-19 and first wave of RSV | Correlation between pre-COVID-19 and second wave of RSV | Correlation between pre-COVID-19 and third wave of RSV |
|------------------------------------------------------------------------------------------------------------------------------------------------------------------------------------------------------------------------------------------------------------|--------------------------------------------------------|---------------------------------------------------------|--------------------------------------------------------|
| Onset†                                                                                                                                                                                                                                                     | 0.47                                                   | 0.18                                                    | 0.99                                                   |
| Peak†                                                                                                                                                                                                                                                      | 0.11                                                   | 0.68                                                    | 0.43                                                   |
| Growth rate‡                                                                                                                                                                                                                                               | 0.05                                                   | 0.35                                                    | 0.71                                                   |
| Intensity‡                                                                                                                                                                                                                                                 | 0.80                                                   | 0.36                                                    | 0.63                                                   |
| † Estimated with circular correlation coefficient<br>‡ Estimated with Pearson's correlation coefficient<br>Countries that had 3 waves of RSV following COVID-19 pandemic included Australia, Brazil, Colombia, France, Iceland, Netherlands, South Africa. |                                                        |                                                         |                                                        |

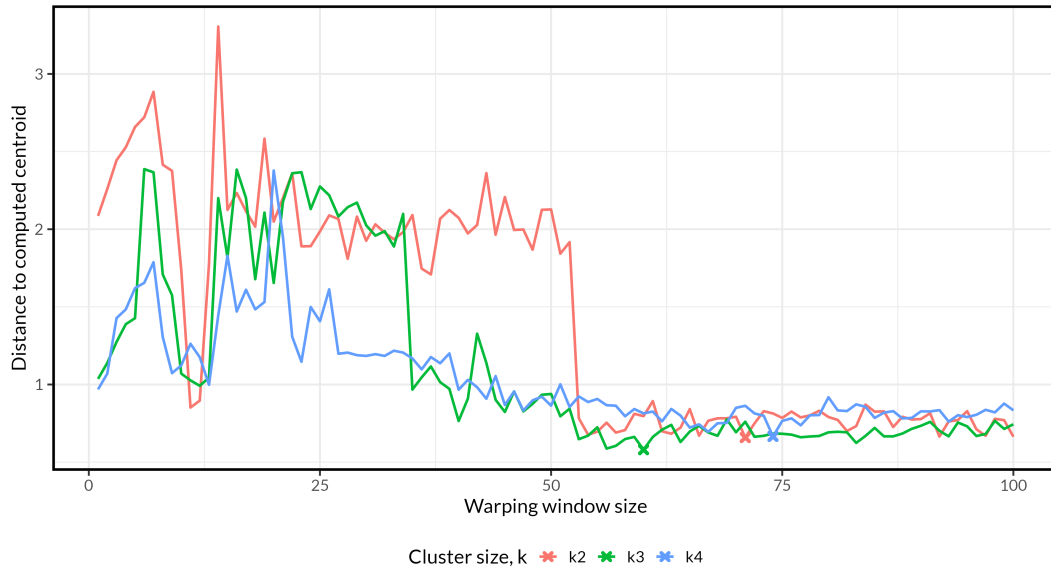

221 Supplementary Figure 9. Evaluation of the optimal DTW window size required to compute  
 222 hierarchical clustering using Modified-Davies-Bouldin cluster validation index which is based  
 223 on calculating the distances from time series to their centroid, where the optimal DTW  
 224 window size is that which minimizes the distances. The centroid of each cluster is computed  
 225 using DTW barycentre averaging function. The optimal DTW window size is identified at  
 226  $w=71$  for two clusters,  $w=60$  for three clusters, and  $w=74$  for four clusters.  
 227

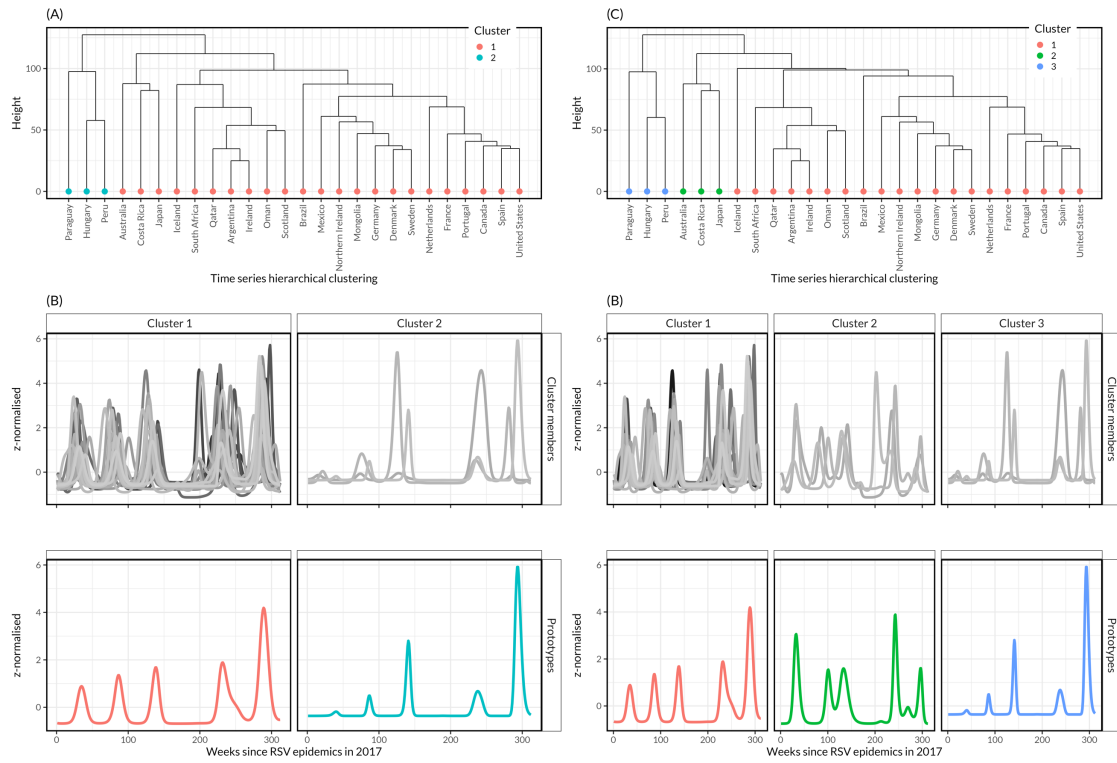

228 Supplementary Figure 10. Sensitivity plots of time series dynamic time warping and time  
 229 series classification using hierarchical clustering. (A, B) Dendrogram representing  
 230 hierarchical clustering and its corresponding series prototypes if the clusters size is set to 2  
 231 and warping window size to 71 as optimal combination of parameters based on Modified  
 232 Davies-Bouldin (DB) internal cluster validity index (CVI). (C, D) Dendrogram representing  
 233 hierarchical clustering and its corresponding series prototypes if number of clusters is set to  
 234 3 and warping window size to 60 based on DB and CVI.  
 235

236 Reference

- 237 1. JGraph, Draw.io. Draw, a configurable diagramming or whiteboarding visualization  
238 application. 2023.
- 239 2. Aghabozorgi S, Seyed Shirخورshidi A, Ying Wah T. Time-series clustering – A decade  
240 review. *Information Systems*. 2015;53:16–38.
- 241 3. Giorgino T. Computing and Visualizing Dynamic Time Warping Alignments in R: The dtw  
242 Package. *Journal of Statistical Software*. 2009;31:1–24.
- 243 4. Sardá-Espinosa A. Time-Series Clustering in R Using the dtwclust Package. *The R*  
244 *Journal*. 2019;11:22.
- 245 5. Meyer D, Buchta C. proxy: Distance and Similarity Measures. R package. 2019.
- 246 6. Sakoe H, Chiba S. Dynamic programming algorithm optimization for spoken word  
247 recognition. *IEEE Transactions on Acoustics, Speech, and Signal Processing*. 1978;26:43–  
248 9.
- 249 7. Ratanamahatana C, Keogh EJ. Everything you know about Dynamic Time Warping is  
250 Wrong. 2004.
- 251 8. Dau HA, Silva DF, Petitjean F, Forestier G, Bagnall A, Mueen A, et al. Optimizing dynamic  
252 time warping's window width for time series data mining applications. *Data Min Knowl Disc*.  
253 2018;32:1074–120.
- 254 9. Hastie T, Tibshirani R, Friedman J. *The Elements of Statistical Learning*. New York, NY:  
255 Springer; 2009.
- 256 10. Hastie T, Tibshirani R. Generalized Additive Models. *Statistical Science*. 1986;1:297–  
257 310.
- 258 11. Zheng Z, Warren JL, Artin I, Pitzer VE, Weinberger DM. Relative timing of respiratory  
259 syncytial virus epidemics in summer 2021 across the United States was similar to a typical  
260 winter season. *Influenza and Other Respiratory Viruses*. 2022;16:617–20.
- 261 12. Boxtel G van, Tom S, Paul K, Abbott B, Aguado J, Annamalai M, et al. gsignal: Signal  
262 Processing. 2022.
- 263 13. Parag KV, Thompson RN, Donnelly CA. Are Epidemic Growth Rates More Informative  
264 than Reproduction Numbers? *Journal of the Royal Statistical Society Series A: Statistics in*  
265 *Society*. 2022;185 Supplement\_1:S5–15.
- 266 14. Lund U, Agostinelli C, Arai H, Gagliardi A, García-Portugués E, Giunchi D, et al. circular:  
267 Circular Statistics. 2022.
- 268 15. Sauerbrei W, Perperoglou A, Schmid M, Abrahamowicz M, Becher H, Binder H, et al.  
269 State of the art in selection of variables and functional forms in multivariable analysis—  
270 outstanding issues. *Diagnostic and Prognostic Research*. 2020;4:3.
